# Supplementary material for: Enhanced Luminous Efficacy and Stability of InP/ZnSeS/ZnS Quantum Dot-Embedded SBA-15 Mesoporous Particles for White Light-Emitting Diodes
Source: MDPI journal article supplement (doi:10.3390/nano12091554), 2022-05-04
Supplement: s1 [file s1]

Supporting Information

# Enhanced Luminous Efficacy and Stability of InP/ZnSeS/ZnS Quantum Dot-Embedded SBA-15 Mesoporous Particles for White Light-Emitting Diodes

Chun-Feng Lai \*, Yu-Ching Chang and Yu-Shan Huang

Department of Photonics, Feng Chia University, Taichung 407, Taiwan; d0889838@o365.fcu.edu.tw (Y.-C.C.); d0963569@o365.fcu.edu.tw (Y.-S.H.)

\* Correspondence: chunflai@fcu.edu.tw; Tel.: +886-4-24517250

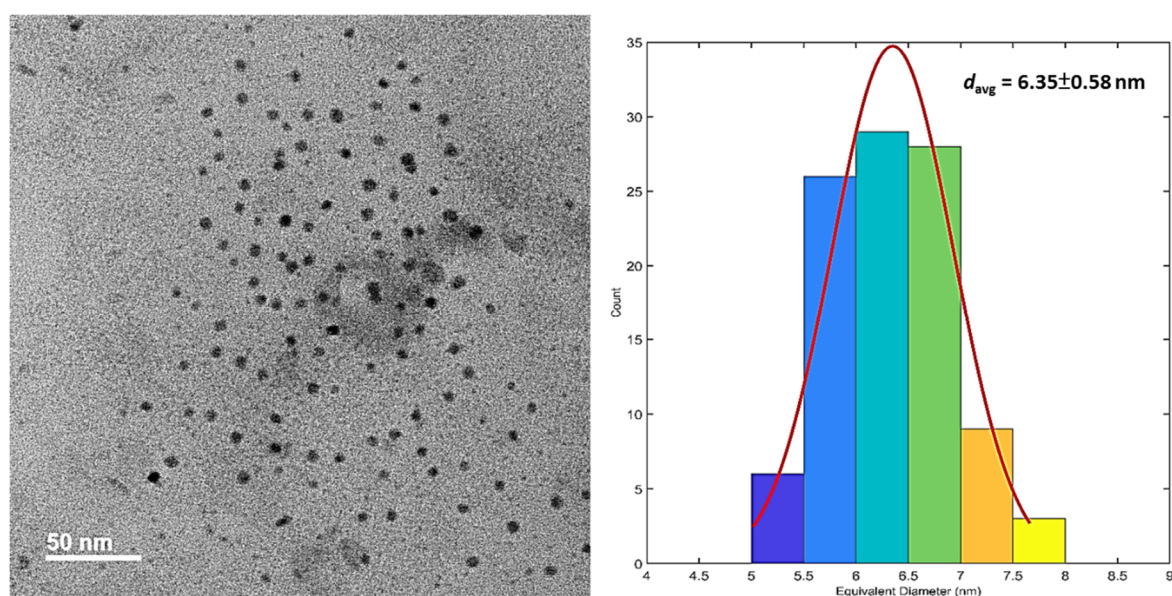

**Figure S1.** (left) FETEM image and (right) histograms of particle size distribution of InP/ZnSeS/ZnS QDs.

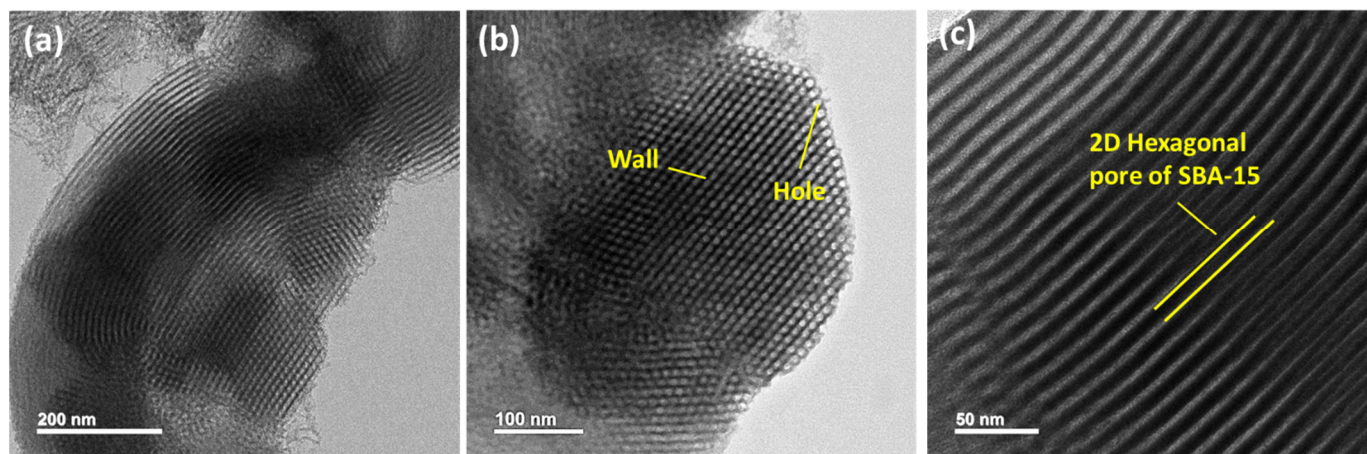

**Figure S2.** The FETEM images of (a) SBA-15 MP and pores of SBA-15 observed from (b) the top view and (c) the lateral view, respectively.

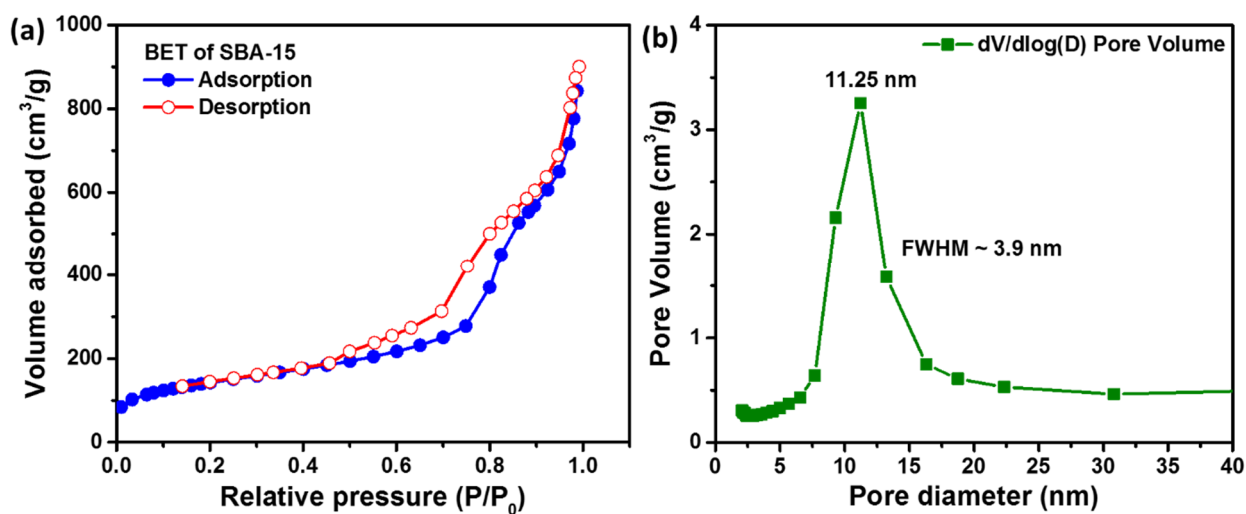

Figure S3. (a)  $N_2$  adsorption-desorption isotherms and (b) pore size distribution of SBA-15 MPs.

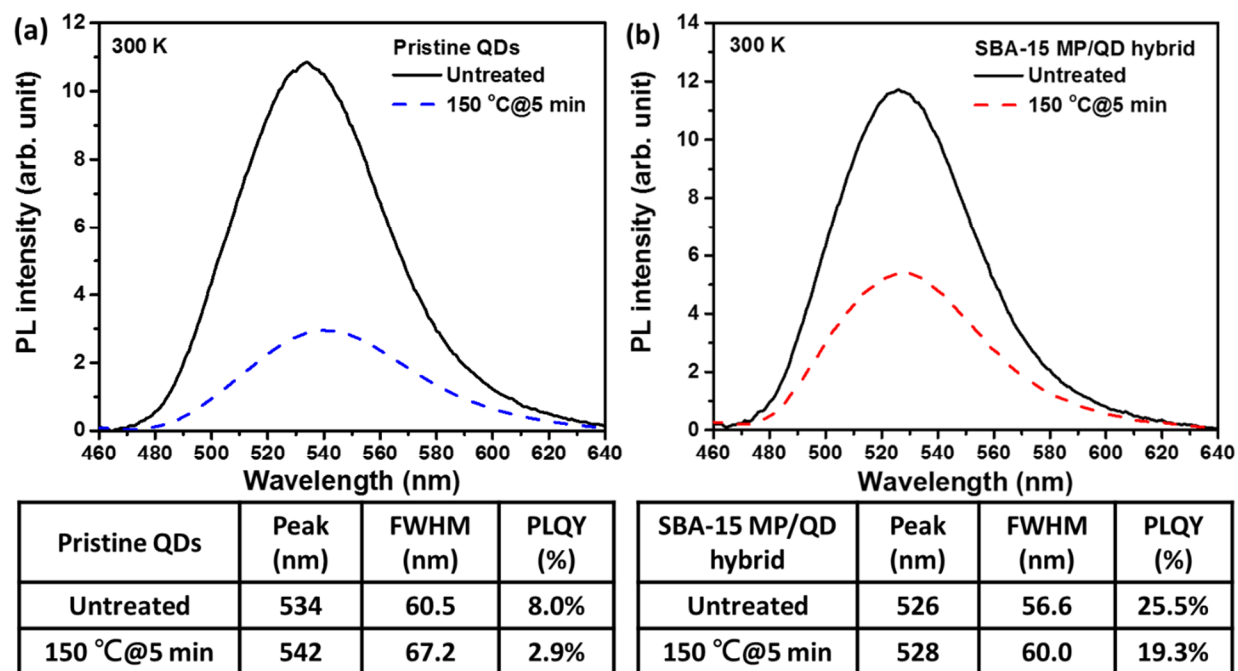

Figure S4. PL spectra of the untreated (a) Pristine QD powder and (b) SBA-15 MP/QD hybrid powder and after annealing at 150 °C for 5 min at room temperature.
